# Supplementary material for: Influence of Reinforcement Structures and Hybrid Types on Inter-Laminar Shear Performance of Carbon-Glass Hybrid Fibers/Bismaleimide Composites under Long-Term Thermo-Oxidative Aging
Source: MDPI journal article supplement (doi:10.3390/polym11081288), 2019-08-01
Supplement: s1 [file s1]

## Supplementary Caption

Fig. S1 Dimension figure of the double-notch shear sample.

Table S1. The ILSS values of the Com 1#, the Com 2# and the Com 3#.

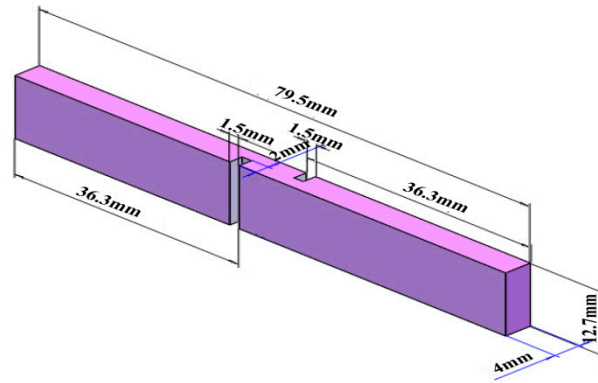

Fig. S1 Dimension figure of the double-notch shear sample.

Table S1. The ILSS values of the Com 1#, the Com 2# and the Com 3#.

| samples | Mean ILSS/MPa |            |            |           |           |                   |
|---------|---------------|------------|------------|-----------|-----------|-------------------|
|         | unaged        | 10-day     | 30-day     | 90-day    | 120-day   | 180-day           |
| Com 1#  | 97.68±16.51   | 50.51±4.03 | 41.47±7.56 | 9.05±1.05 | 8.43±0.81 | 7.01±0.63         |
| Com 2#  | 80.62±6.21    | 42.63±6.15 | 36.90±7.81 | 7.5±0.62  | 7.01±0.51 | 6.04 <sup>1</sup> |
| Com 3#  | 78.10±2.91    | 39.32±6.45 | 33.36±4.12 | 3.11±0.61 | 1.21±0.19 | 0.98 <sup>1</sup> |

6.04<sup>1</sup> and 0.98<sup>1</sup>: Because the delamination failure directly occurred in two laminated orthogonal hybrid composites of three before the inter-laminar shear test, there was only one value of the ILSS of the laminated orthogonal hybrid composites.
